# Supplementary material for: Hierarchical heterostructure of Ag-nanoparticle decorated fullerene nanorods (Ag–FNRs) as an effective single particle freestanding SERS substrate
Source: Royal Society of Chemistry journal article supplement (doi:10.1039/c8cp02779j), 2018-01-01
Supplement: c8cp02779j1.pdf [file c8cp02779j1.pdf]

## Supporting Information

### Hierarchical Heterostructure of Ag-Nanoparticle Decorated Fullerene Nanorods (Ag-FNRs) as an Effective Single Particle Freestanding SERS Substrate

Gundam Sandeep Kumar,<sup>#,a</sup> Rekha Goswami Shrestha,<sup>#,b</sup> Qingmin Ji,<sup>c</sup> Jonathan P. Hill,<sup>c</sup>  
Katsuhiko Ariga,<sup>b,d</sup> Somobrata Acharya<sup>\*a</sup> and Lok Kumar Shrestha<sup>\*b</sup>

<sup>a</sup>Center for Advanced Materials (CAM), Indian Association for the Cultivation of Science (IACS),  
Jadavpur, Kolkata 700 032, India

<sup>b</sup>International Center for Materials Nanoarchitectonics (WPI-MANA), National Institute for Materials  
Science (NIMS), 1-1 Namiki, Tsukuba, Ibaraki 305-0044, Japan

<sup>c</sup>Herbert Gleiter Institute of Nanoscience, Nanjing University of Science & Technology, 200  
Xiaolingwei, Nanjing 210094, China

<sup>d</sup>Department of Advanced Materials Science, Graduate School of Frontier Sciences, The University of  
Tokyo, 5-1-5 Kashiwanoha, Kashiwa, Chiba 277-8561, Japan

#### \*Contact Authors

Somobrata Acharya (camsa2@iacs.res.in)

Lok Kumar Shrestha (SHRESTHA.Lokkumar@nims.go.jp)

# G.S.K and R.G.S. have equally contributed to this work.

**Contents**

1. Additional SEM images and histograms of length and diameter distribution of FNRs .....S-3

2. Additional TEM images of FNRs .....S-4

3. Additional SEM images of Ag-FNRs .....S-5

4. Histogram of size distributions of Ag-NP in Ag-FNRs heterostructure.....S-5

5. Additional TEM images of Ag-FNRs heterostructure.....S-6

6. Additional HR-TEM images of Ag-FNRs heterostructure.....S-7

7. Additional XPS data.....S-8

8. Optical micrographs of Ag-FNR before and after Raman laser irradiations.....S-8

9. Additional SERS data: Dependence of SERS peak against R6G concentration.....S-9

10. SERS data on Ag-NP thin film on planar substrate.....S-10

### 1. Additional SEM images and histograms of length and diameter distributions of FNRs

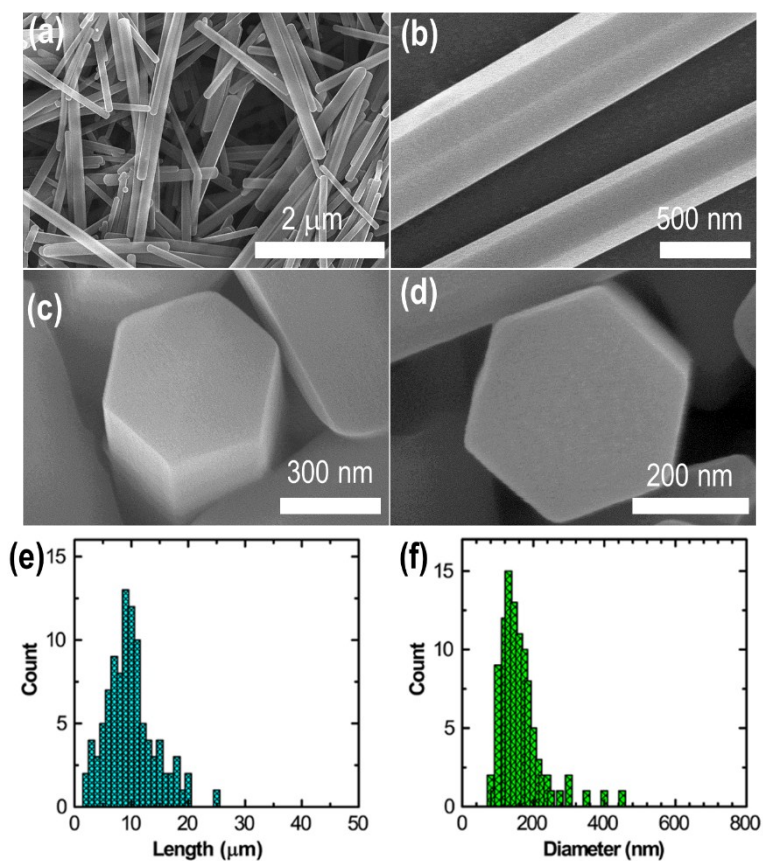

**Fig. S1** (a – d) SEM images of ultrarapidly grown FNRs, (e) histogram of length distribution of randomly selected 100 FNRs with mean length of  $\sim 11 \mu\text{m}$ , and (f) corresponding diameter distribution with mean diameter of  $\sim 215 \text{ nm}$ .

## 2. Additional TEM images of FNRs

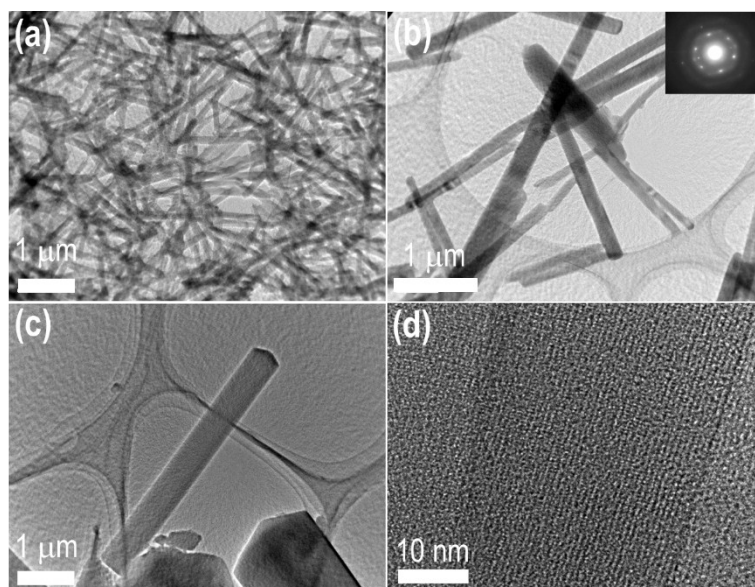

**Fig S2** (a – c) TEM images of ultrarapidly grown FNRs, and (d) HR-TEM image of FNR from the thin edge region. SAED pattern (inset of panel b) indicates the highly crystalline nature of FNRs.

### 3. Additional SEM images of Ag-FNRs

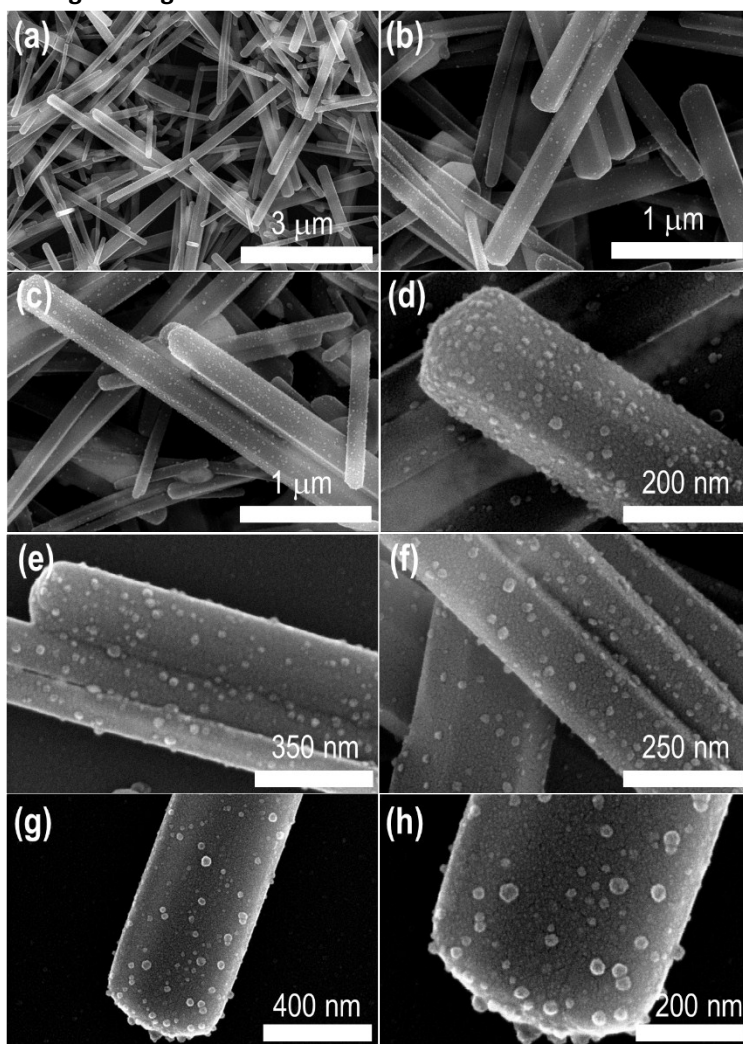

Fig. S3 Additional SEM images of Ag-FNRs.

### 4. Histogram of size distribution of Ag-NP in Ag-FNRs heterostructure

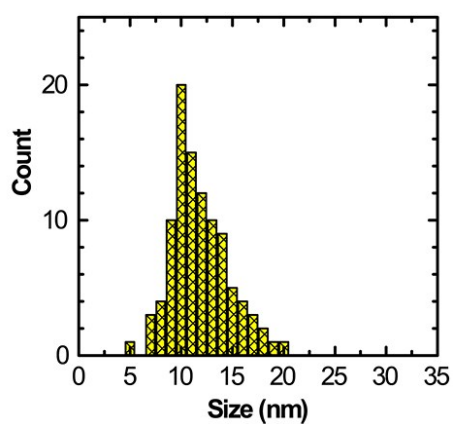

Fig. S4 Histogram of size distribution of Ag-NP in Ag-FNRs with mean diameter of  $\sim 12$  nm.

### 5. Additional TEM images of Ag-FNRs

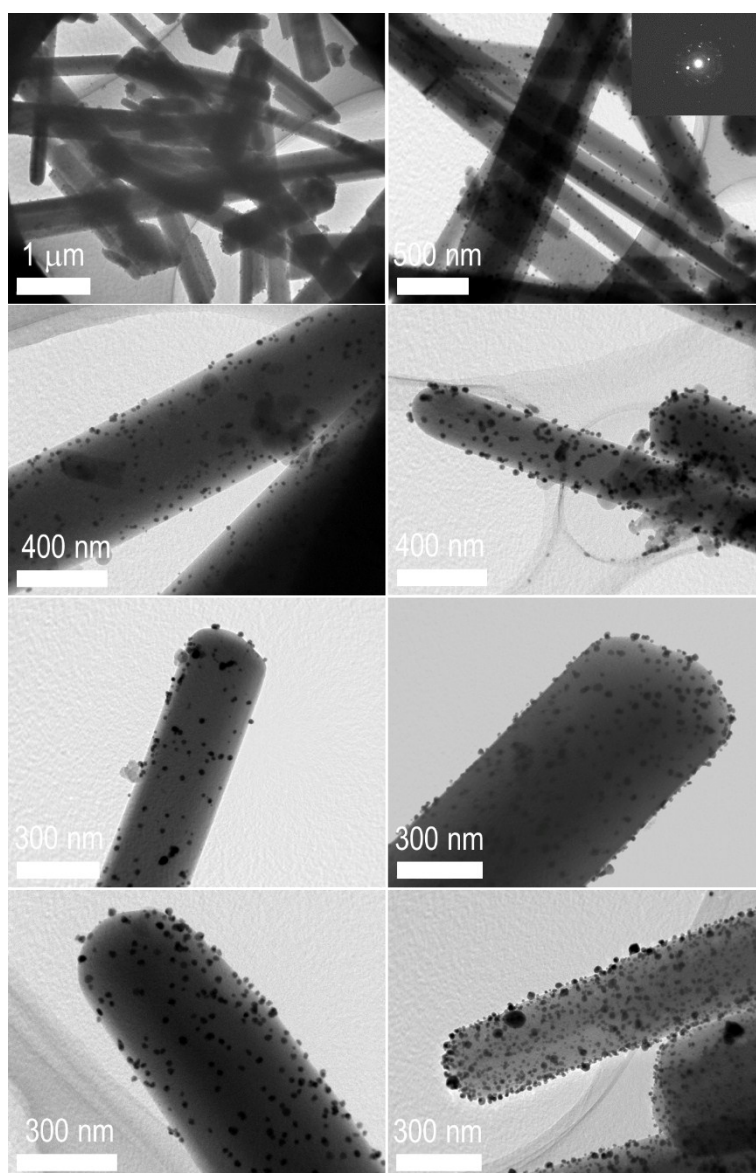

**Fig. S5** Additional TEM images of Ag-FNRs. Inset of top right image shows SAED pattern.

## 6. Additional HR-TEM images of Ag-FNRs

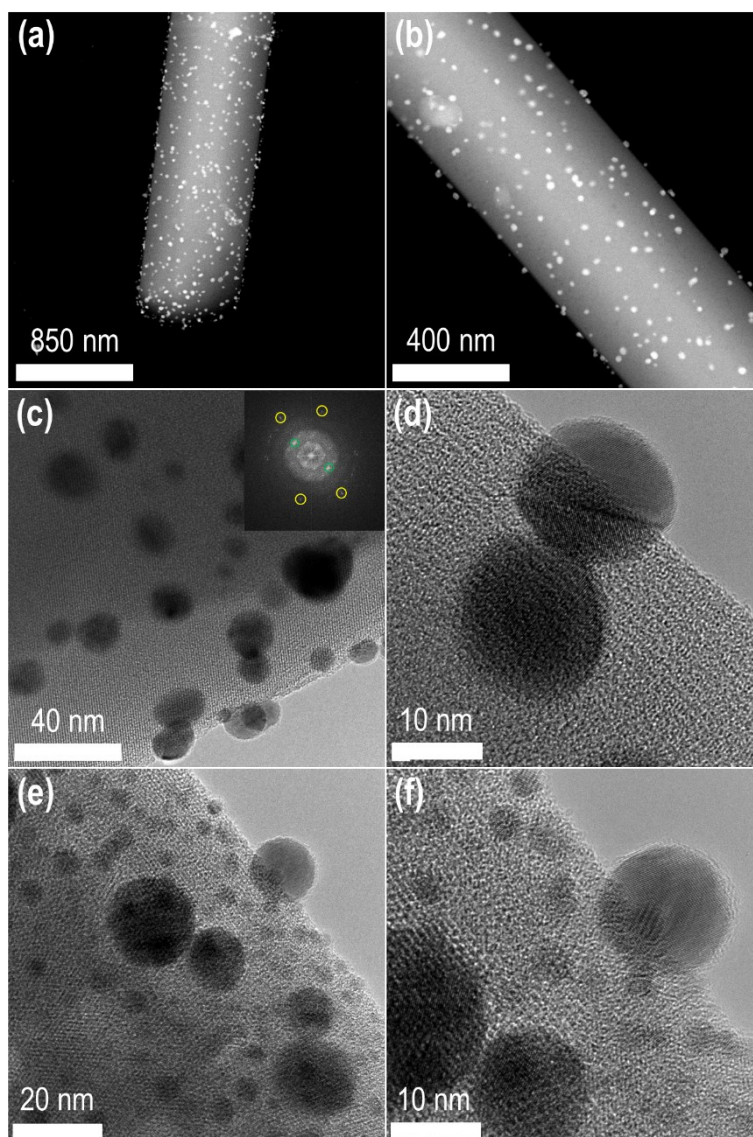

**Fig. S6** (a, b) Dark field TEM images of Ag-FNRs as typical examples and (c – f) additional HR-TEM images of Ag-FNRs. Inset of panel c shows SAED pattern of the Ag-FNR. Yellow circles reflect the diffraction of Ag-NP and green circles represent electron diffraction from crystalline fullerene C<sub>60</sub>.

## 7. Additional XPS data

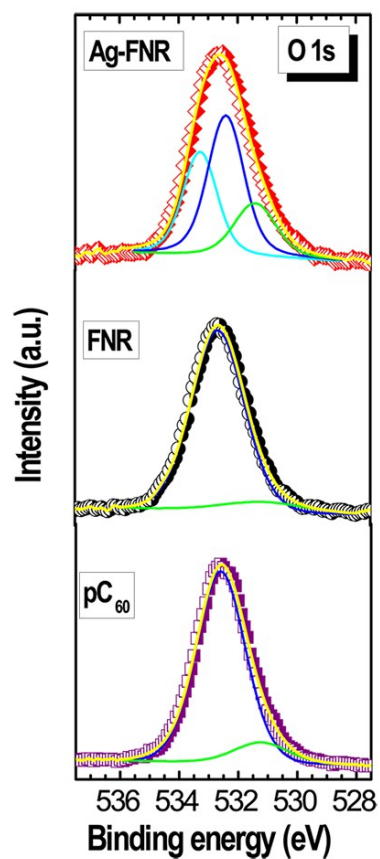

**Fig. S7** XPS O 1s spectra with deconvoluted peaks for pC<sub>60</sub>, FNR and Ag-FNR.

## 8. Optical micrographs of Ag-FNR before and after Raman laser irradiations

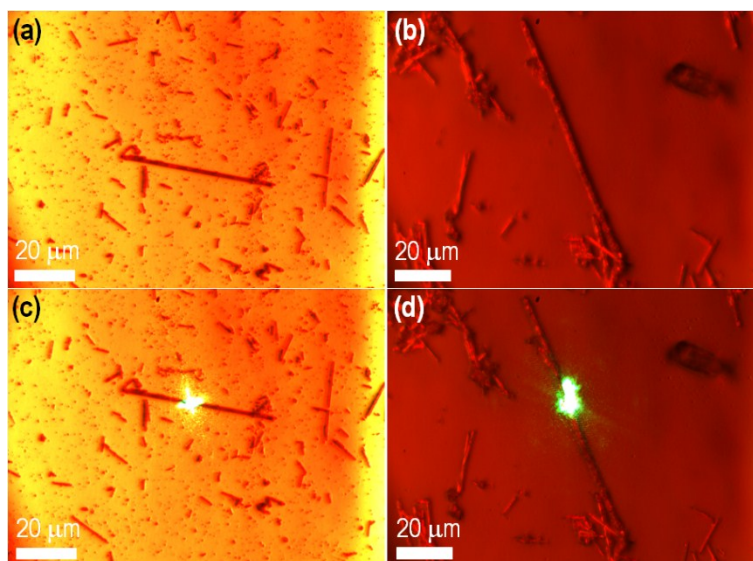

**Fig. S8** Optical microscopic images of Ag-FNR on Si-substrate before (a,b) and after (c,d) Raman Laser irradiation during SERS measurements.



### 9. Additional SERS data: Dependence of SERS peak against R6G concentration

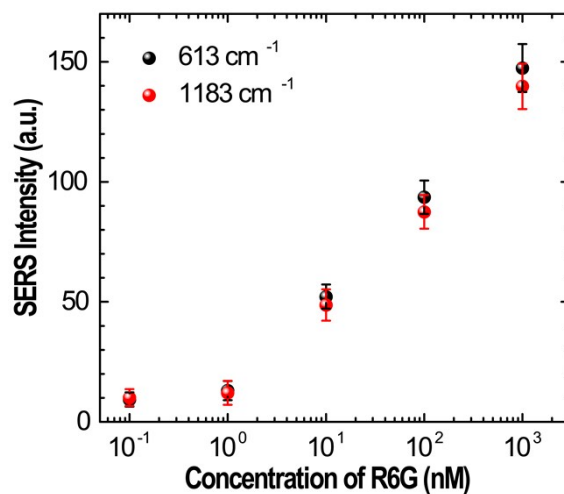

Fig. S9 Dependence of SERS peak intensity at 613 and 1183 cm<sup>-1</sup> against R6G concentration.

### 10. SERS data on Ag-NP thin film on planar substrate

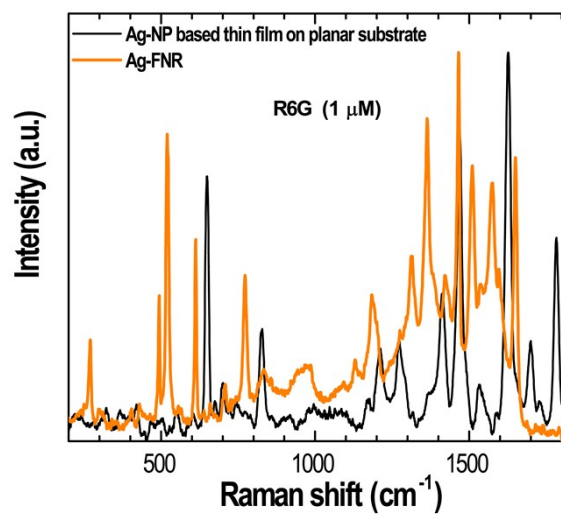

Fig. S10 Comparison of SERS data acquired on Ag-NP thin film on a planar substrate and Ag-FNR free standing substrate. R6G concentration is fixed to 1 μM.
